# Supplementary material for: The Relationships between PM2.5 and Meteorological Factors in China: Seasonal and Regional Variations
Source: PubMed Central journal article supplement (PMC5750928; doi:10.3390/ijerph14121510), 2017-12-05
Supplement: ijerph-14-01510-s001.pdf [file ijerph-14-01510-s001.pdf]

# Supplementary materials

**Table S1.** The result of the parameter sensitivity test in Beijing.

| Buffer radius | r-RH | r-TEM | r-WS  | r-PS | City number |
|---------------|------|-------|-------|------|-------------|
| 0.1°          | 0.49 | -0.13 | -0.19 | 0.05 | 24          |
| 0.2°          | 0.49 | -0.13 | -0.20 | 0.05 | 44          |
| 0.3°          | 0.45 | -0.11 | -0.24 | 0.03 | 68          |
| 0.4°          | 0.46 | -0.11 | -0.24 | 0.04 | 72          |
| 0.5°          | 0.46 | -0.13 | -0.33 | 0.06 | 74          |
| 0.6°          | 0.44 | -0.13 | -0.32 | 0.06 | 74          |

City number is the number of cities in which PM<sub>2.5</sub> concentration data and meteorological parameters were successfully matched. r-RH, r-TEM, r-WS, and r-PS represent the correlation coefficients between PM<sub>2.5</sub> concentration and RH, TEM, WS, and PS.

**Table S2.** The corresponding relationships between cities, provinces, and regions.

| Region        | Province  | City         | Region     | Province | City         |             |
|---------------|-----------|--------------|------------|----------|--------------|-------------|
| North China   | Beijing   | Beijing      | East China | Jiangsu  | Nanjing      |             |
|               | Tianjin   | Tianjin      |            |          | Shanghai     |             |
|               | Hebei     | Shijiazhuang |            |          | Shijiazhuang | Suzhou      |
|               |           |              |            |          | Tangshan     | Nantong     |
|               |           |              |            |          | Qinhuangdao  | Lianyungang |
|               |           |              |            |          | Baoding      | Xuzhou      |
|               |           |              |            |          | Zhangjiakou  | Yangzhou    |
|               |           |              |            |          | Chengde      | Wuxi        |
|               |           |              |            |          | Xingtai      | Changzhou   |
|               | Shanxi    | Taiyuan      |            |          | Zhenjiang    |             |
| Nei Mongolia  | Huhehaote | Taizhou      |            |          |              |             |
| South China   | Guangdong | Guangzhou    | East China | Zhejiang | Huai'an      |             |
|               |           | Shenzhen     |            |          | Yancheng     |             |
|               |           | Zhuhai       |            |          | Suqian       |             |
|               |           | Foshan       |            |          | Hangzhou     |             |
|               |           | Zhongshan    |            |          | Ningbo       |             |
|               |           | Dongguan     |            |          | Wenzhou      |             |
|               |           | Huizhou      |            |          | Shaoxing     |             |
|               |           | Zhaoqing     |            |          | Huzhou       |             |
|               | Guangxi   | Nanning      |            |          | Taizhou      |             |
|               | Hainan    | Haikou       |            |          | Zhoushan     |             |
| Central China | Hubei     | Wuhan        | Jinhua     |          |              |             |
|               | Henan     | Zhengzhou    | Quzhou     |          |              |             |

|                            |           |           |                            |              |           |
|----------------------------|-----------|-----------|----------------------------|--------------|-----------|
|                            | Hunan     | Changsha  |                            |              | Lishui    |
| <b>Northwest<br/>China</b> | Shaanxi   | Xi'an     |                            | Anhui        | Hefei     |
|                            | Gansu     | Lanzhou   |                            | Fujian       | Fuzhou    |
|                            | Qinghai   | Xining    |                            |              | Xiamen    |
|                            | Ningxia   | Yinchuan  |                            | Jiangxi      | Nanchang  |
|                            | Xinjiang  | Urumqi    |                            | Shandong     | Jinan     |
|                            |           |           |                            |              | Qingdao   |
| <b>Northeast<br/>China</b> | Chongqing | Chongqing | <b>Northeast<br/>China</b> | Liaoning     | Shengyang |
|                            | Sichuan   | Chengdu   |                            |              | Dalian    |
|                            | Guizhou   | Guiyang   |                            | Jilin        | Changchun |
|                            | Yunnan    | Kunming   |                            |              | Ha'erbin  |
|                            | Xizang    | Lhasa     |                            | Heilongjiang |           |

**Table S3.** The correlation coefficient (r) values and p-values between PM<sub>2.5</sub> concentration and the four meteorological factors in the 68 cities.

| Region                     | City         | r-RH   | P-RH   | r-TEM  | P-TEM  | r-WS   | P-WS  | r-PS   | P-PS  |
|----------------------------|--------------|--------|--------|--------|--------|--------|-------|--------|-------|
| <b>Northeast<br/>China</b> | Shengyang    | 0.061  | 0.007  | -0.299 | 0.000  | -0.145 | 0.000 | 0.353  | 0.000 |
|                            | Dalian       | 0.121  | 0.002  | -0.179 | 0.000  | -0.173 | 0.000 | 0.134  | 0.000 |
|                            | Changchun    | -0.148 | 0.728  | -0.401 | 0.000  | -0.043 | 0.001 | 0.481  | 0.000 |
|                            | Ha'erbin     | -0.081 | 0.083  | -0.514 | 0.000  | -0.090 | 0.000 | 0.502  | 0.000 |
| <b>North<br/>China</b>     | Beijing      | 0.484  | 0.000  | -0.072 | 0.001  | -0.376 | 0.000 | -0.004 | 0.218 |
|                            | Tianjin      | 0.307  | 0.000  | -0.106 | 0.000  | -0.206 | 0.000 | -0.075 | 0.041 |
|                            | Shijiazhuang | 0.331  | 0.000  | -0.368 | 0.000  | -0.291 | 0.000 | -0.228 | 0.017 |
|                            | Tangshan     | 0.294  | 0.000  | -0.149 | 0.000  | -0.202 | 0.000 | -0.204 | 0.353 |
|                            | Qinhuangdao  | 0.161  | 0.000  | -0.202 | 0.000  | 0.022  | 0.444 | -0.190 | 0.149 |
|                            | Baoding      | 0.272  | 0.000  | -0.380 | 0.000  | -0.212 | 0.000 | -0.067 | 0.976 |
|                            | Zhangjiakou  | 0.166  | 0.000  | -0.300 | 0.000  | -0.030 | 0.007 | -0.030 | 0.817 |
|                            | Chengde      | 0.238  | 0.000  | -0.137 | 0.000  | -0.221 | 0.000 | 0.034  | 0.070 |
|                            | Xingtai      | 0.274  | 0.000  | -0.370 | 0.000  | -0.266 | 0.000 | 0.243  | 0.000 |
|                            | Taiyuan      | 0.062  | 0.010  | -0.287 | 0.000  | -0.248 | 0.000 | 0.192  | 0.043 |
| Huhehaote                  | 0.091        | 0.048  | -0.174 | 0.000  | -0.088 | 0.013  | 0.153 | 0.000  |       |
| <b>South<br/>China</b>     | Guangzhou    | -0.376 | 0.000  | -0.427 | 0.000  | -0.179 | 0.004 | 0.444  | 0.000 |
|                            | Shenzhen     | -0.504 | 0.000  | -0.531 | 0.000  | -0.031 | 0.311 | -0.061 | 0.064 |
|                            | Zhuhai       | -0.502 | 0.000  | -0.596 | 0.000  | -0.233 | 0.000 | 0.119  | 0.017 |
|                            | Foshan       | -0.423 | 0.000  | -0.440 | 0.000  | -0.233 | 0.000 | 0.471  | 0.000 |
|                            | Zhongshan    | -0.445 | 0.000  | -0.510 | 0.000  | -0.274 | 0.000 | 0.073  | 0.002 |
|                            | Dongguan     | -0.375 | 0.000  | -0.450 | 0.000  | -0.273 | 0.000 | 0.153  | 0.229 |
|                            | Huizhou      | -0.585 | 0.000  | -0.453 | 0.000  | -0.019 | 0.703 | -0.027 | 0.501 |
|                            | Zhaoqing     | -0.322 | 0.000  | -0.453 | 0.000  | -0.356 | 0.000 | -0.188 | 0.001 |
| Nanning                    | -0.324       | 0.000  | -0.534 | 0.000  | -0.435 | 0.000  | 0.592 | 0.000  |       |
| Haikou                     | -0.157       | 0.000  | -0.590 | 0.000  | 0.220  | 0.005  | 0.606 | 0.000  |       |
| <b>Central<br/>China</b>   | Wuhan        | -0.197 | 0.001  | -0.510 | 0.000  | -0.249 | 0.000 | 0.518  | 0.000 |
|                            | Zhengzhou    | 0.143  | 0.000  | -0.282 | 0.000  | -0.255 | 0.000 | 0.230  | 0.000 |
|                            | Changsha     | -0.152 | 0.002  | -0.408 | 0.000  | -0.188 | 0.018 | 0.483  | 0.000 |
| <b>Northwest<br/>China</b> | Xi'an        | -0.053 | 0.157  | -0.509 | 0.000  | -0.085 | 0.000 | -0.018 | 0.208 |
|                            | Lanzhou      | -0.212 | 0.000  | -0.302 | 0.000  | -0.255 | 0.009 | 0.087  | 0.031 |
|                            | Xining       | -0.359 | 0.000  | -0.399 | 0.000  | -0.255 | 0.002 | 0.049  | 0.268 |
|                            | Yinchuan     | 0.134  | 0.000  | -0.556 | 0.000  | -0.294 | 0.000 | 0.363  | 0.000 |
|                            | Urumqi       | 0.374  | 0.000  | -0.503 | 0.000  | -0.410 | 0.000 | -0.189 | 0.010 |

| Region             | City        | r-RH   | P-RH   | r-T    | P-T    | r-WS   | P-WS   | r-P    | P-P   |
|--------------------|-------------|--------|--------|--------|--------|--------|--------|--------|-------|
| Southwest<br>China | Chongqing   | -0.008 | 0.018  | -0.462 | 0.000  | -0.446 | 0.000  | 0.471  | 0.000 |
|                    | Chengdu     | -0.170 | 0.001  | -0.416 | 0.000  | -0.339 | 0.000  | -0.224 | 0.000 |
|                    | Guiyang     | -0.237 | 0.000  | -0.408 | 0.000  | -0.248 | 0.000  | 0.298  | 0.000 |
|                    | Kunming     | -0.277 | 0.000  | -0.309 | 0.000  | 0.070  | 0.382  | 0.436  | 0.000 |
|                    | Lhasa       | -0.429 | 0.000  | -0.300 | 0.000  | -0.242 | 0.000  | -0.201 | 0.000 |
| East China         | Nanjing     | -0.174 | 0.005  | -0.296 | 0.000  | -0.179 | 0.000  | 0.268  | 0.000 |
|                    | Shanghai    | -0.174 | 0.000  | -0.252 | 0.000  | -0.247 | 0.000  | 0.156  | 0.000 |
|                    | Suzhou      | -0.159 | 0.000  | -0.293 | 0.000  | -0.320 | 0.000  | -0.064 | 0.818 |
|                    | Nantong     | -0.283 | 0.000  | -0.226 | 0.000  | -0.319 | 0.000  | -0.145 | 0.131 |
|                    | Lianyungang | -0.185 | 0.036  | -0.271 | 0.000  | -0.436 | 0.000  | 0.203  | 0.000 |
|                    | Xuzhou      | -0.097 | 0.809  | -0.420 | 0.000  | -0.087 | 0.023  | 0.342  | 0.000 |
|                    | Yangzhou    | -0.160 | 0.004  | -0.347 | 0.000  | -0.174 | 0.000  | -0.170 | 0.750 |
|                    | Wuxi        | -0.103 | 0.051  | -0.357 | 0.000  | -0.346 | 0.000  | -0.063 | 0.876 |
|                    | Changzhou   | -0.152 | 0.003  | -0.349 | 0.000  | -0.321 | 0.000  | -0.081 | 0.858 |
|                    | Zhenjiang   | -0.174 | 0.000  | -0.242 | 0.000  | -0.264 | 0.000  | -0.159 | 0.708 |
|                    | Taizhou     | -0.392 | 0.000  | 0.066  | 0.849  | -0.359 | 0.000  | 0.103  | 0.415 |
|                    | Huai'an     | -0.218 | 0.028  | -0.363 | 0.000  | -0.122 | 0.001  | -0.206 | 0.046 |
|                    | Yancheng    | -0.323 | 0.000  | 0.060  | 0.752  | -0.397 | 0.000  | 0.107  | 0.396 |
|                    | Suqian      | -0.108 | 0.557  | -0.301 | 0.000  | -0.160 | 0.000  | -0.098 | 0.051 |
|                    | Hangzhou    | -0.142 | 0.125  | -0.402 | 0.000  | -0.291 | 0.000  | 0.409  | 0.000 |
|                    | Ningbo      | -0.312 | 0.000  | -0.447 | 0.000  | -0.376 | 0.000  | 0.388  | 0.000 |
|                    | Wenzhou     | -0.157 | 0.000  | -0.532 | 0.000  | -0.177 | 0.000  | -0.091 | 0.004 |
|                    | Shaoxing    | -0.021 | 0.674  | -0.459 | 0.000  | -0.326 | 0.000  | -0.089 | 0.165 |
|                    | Huzhou      | -0.183 | 0.009  | -0.430 | 0.000  | -0.234 | 0.000  | -0.170 | 0.010 |
|                    | Taizhou     | -0.151 | 0.000  | -0.374 | 0.000  | -0.244 | 0.000  | -0.091 | 0.084 |
|                    | Zhoushan    | -0.282 | 0.000  | -0.381 | 0.000  | -0.296 | 0.000  | 0.289  | 0.000 |
|                    | Jinhua      | -0.257 | 0.000  | -0.408 | 0.000  | -0.297 | 0.000  | -0.107 | 0.045 |
|                    | Quzhou      | -0.323 | 0.000  | -0.396 | 0.000  | -0.151 | 0.000  | 0.433  | 0.000 |
|                    | Lishui      | -0.223 | 0.000  | -0.495 | 0.000  | -0.223 | 0.000  | -0.014 | 0.436 |
| Hefei              | -0.138      | 0.093  | -0.352 | 0.000  | -0.326 | 0.000  | -0.100 | 0.021  |       |
| Fuzhou             | -0.233      | 0.000  | -0.342 | 0.000  | -0.183 | 0.000  | 0.289  | 0.000  |       |
| Xiamen             | -0.158      | 0.000  | -0.313 | 0.000  | -0.148 | 0.000  | 0.266  | 0.000  |       |
| Nanchang           | -0.393      | 0.000  | -0.251 | 0.000  | -0.290 | 0.000  | 0.338  | 0.000  |       |
| Jinan              | 0.211       | 0.000  | -0.219 | 0.000  | -0.285 | 0.000  | 0.124  | 0.000  |       |
| Qingdao            | -0.129      | 0.183  | -0.293 | 0.000  | -0.064 | 0.037  | 0.205  | 0.000  |       |

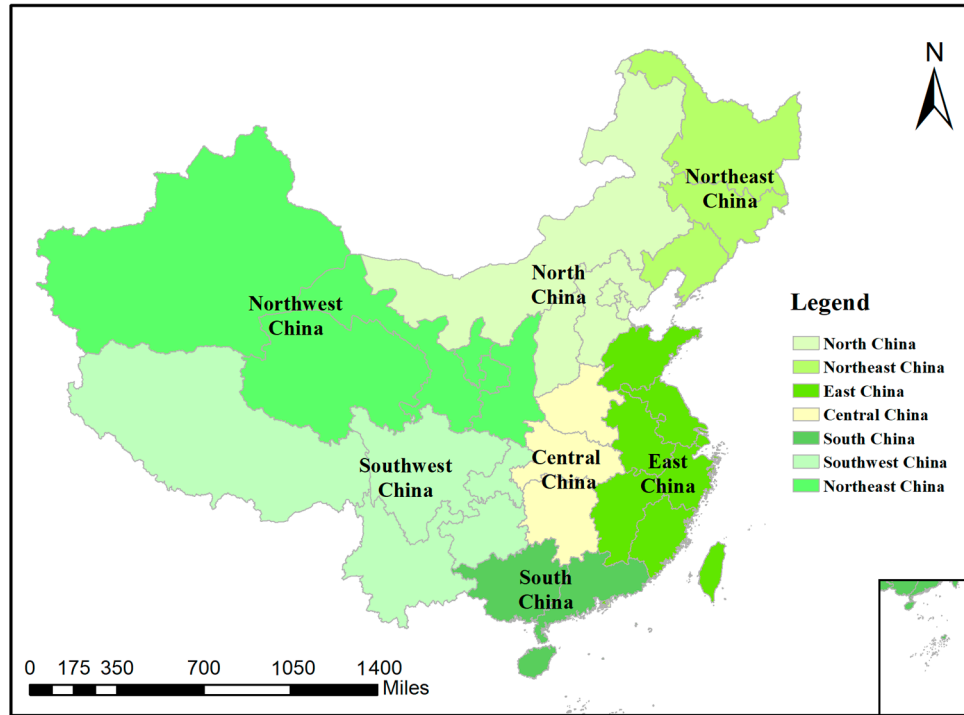

Figure S1. The seven regions in China.

#### Supplementary materials—sensitivity test:

To test whether the PM<sub>2.5</sub> measuring results are sensitive to humidity and can further influence the correlation results, we omit the days with the highest humidity, and use the left days to calculate the correlation coefficients. We adopt two different humidity thresholds to complete the sensitivity test. The first one is to remove the days with relative humidity larger than 95% and the second threshold is set to be 90%. We compare the Spearman coefficients calculated under the three different conditions:

1. remove the days with relative humidity higher than 90%;
2. remove the days with relative humidity higher than 95%;
3. use all the days with valid measurements.

TableS4. The sensitivity test results

| Region      | City         | RH    |       |       | TEM    |        |        | WS     |        |        | PS     |        |        |
|-------------|--------------|-------|-------|-------|--------|--------|--------|--------|--------|--------|--------|--------|--------|
|             |              | 90%   | 95%   | ALL   | 90%    | 95%    | ALL    | 90%    | 95%    | ALL    | 90%    | 95%    | ALL    |
| North China | Beijing      | 0.489 | 0.487 | 0.484 | -0.062 | -0.058 | -0.072 | -0.293 | -0.293 | -0.376 | -0.008 | -0.018 | -0.004 |
|             | Tianjin      | 0.311 | 0.307 | 0.307 | -0.106 | -0.103 | -0.106 | -0.132 | -0.138 | -0.206 | 0.028  | 0.029  | -0.075 |
|             | Shijiazhuang | 0.374 | 0.350 | 0.331 | -0.368 | -0.364 | -0.368 | -0.251 | -0.242 | -0.291 | -0.204 | -0.193 | -0.228 |
|             | Tangshan     | 0.320 | 0.308 | 0.294 | -0.129 | -0.137 | -0.149 | -0.164 | -0.162 | -0.202 | -0.261 | -0.259 | -0.204 |
|             | Qinhuangdao  | 0.206 | 0.178 | 0.161 | -0.193 | -0.182 | -0.202 | 0.092  | 0.078  | 0.022  | -0.246 | -0.243 | -0.190 |
|             | Baoding      | 0.299 | 0.274 | 0.272 | -0.363 | -0.368 | -0.380 | -0.134 | -0.136 | -0.212 | -0.121 | -0.114 | -0.067 |
|             | Zhangjiakou  | 0.170 | 0.170 | 0.166 | -0.303 | -0.303 | -0.300 | 0.012  | 0.012  | -0.030 | -0.019 | -0.019 | -0.030 |
|             | Chengde      | 0.256 | 0.245 | 0.238 | -0.129 | -0.129 | -0.137 | -0.169 | -0.164 | -0.221 | 0.041  | 0.038  | 0.034  |
|             | Xingtai      | 0.299 | 0.274 | 0.274 | -0.363 | -0.364 | -0.370 | -0.235 | -0.216 | -0.266 | 0.249  | 0.253  | 0.243  |
|             | Taiyuan      | 0.091 | 0.062 | 0.062 | -0.271 | -0.273 | -0.287 | -0.201 | -0.196 | -0.248 | 0.177  | 0.185  | 0.192  |

|                    |           |        |        |        |        |        |        |        |        |        |        |        |        |
|--------------------|-----------|--------|--------|--------|--------|--------|--------|--------|--------|--------|--------|--------|--------|
|                    | Guangzhou | -0.385 | -0.390 | -0.376 | -0.440 | -0.417 | -0.427 | -0.142 | -0.150 | -0.179 | 0.422  | 0.432  | 0.444  |
|                    | Shenzhen  | -0.503 | -0.512 | -0.504 | -0.569 | -0.530 | -0.531 | -0.029 | -0.017 | -0.031 | -0.040 | -0.025 | -0.061 |
|                    | Zhuhai    | -0.512 | -0.498 | -0.502 | -0.638 | -0.614 | -0.596 | -0.224 | -0.219 | -0.233 | 0.113  | 0.126  | 0.119  |
|                    | Foshan    | -0.421 | -0.425 | -0.423 | -0.468 | -0.441 | -0.440 | -0.197 | -0.205 | -0.233 | 0.455  | 0.461  | 0.471  |
| <b>South China</b> | Zhongshan | -0.462 | -0.450 | -0.445 | -0.545 | -0.531 | -0.510 | -0.245 | -0.237 | -0.274 | 0.039  | 0.056  | 0.073  |
|                    | Dongguan  | -0.308 | -0.369 | -0.375 | -0.468 | -0.448 | -0.450 | -0.252 | -0.243 | -0.273 | 0.113  | 0.127  | 0.153  |
|                    | Huizhou   | -0.544 | -0.565 | -0.585 | -0.510 | -0.473 | -0.453 | -0.001 | -0.019 | -0.019 | -0.110 | -0.102 | -0.027 |
|                    | Zhaoqing  | -0.345 | -0.330 | -0.322 | -0.447 | -0.442 | -0.453 | -0.337 | -0.335 | -0.356 | -0.089 | -0.100 | -0.188 |
|                    | Nanning   | -0.334 | -0.325 | -0.324 | -0.575 | -0.533 | -0.534 | -0.446 | -0.418 | -0.435 | 0.615  | 0.589  | 0.592  |
|                    | Haikou    | -0.197 | -0.153 | -0.157 | -0.595 | -0.588 | -0.590 | 0.208  | 0.224  | 0.220  | 0.603  | 0.607  | 0.606  |

\* RH, T, WS, P stands for the Spearman coefficients between PM<sub>2.5</sub> and relative humidity, temperature, wind speed, and pressure.; 90%, 95%, and all stands for the three different conditions.

The comparing results of North China and South China are listed in Table S4. There are some difference among the correlations under three different conditions, however, the difference is not great. Most importantly, the overall varying pattern kept consistent with our previous analysis. RH is positively correlated with PM<sub>2.5</sub> concentration in North China and inversely in South China; TEM and WS is negatively correlated with PM<sub>2.5</sub> concentrations expect that PM<sub>2.5</sub> concentration in Haikou has a positive correlation with WS; a positive correlation is found between PM<sub>2.5</sub> concentration and surface pressure in Northeast China, Central China, and Hainan province while the correlation in other cities is relatively weak. Therefore, we believe that our results may be not sensitive to RH.
